# Supplementary material for: Differential Impacts of Acacia Invasion on Nutrient Fluxes in Two Distinct Bornean Lowland Tropical Rain Forests
Source: MDPI journal article supplement (doi:10.3390/f13122101), 2022-12-09
Supplement: s1 [file s1]

**Table S1.** Results of ANOVA from the linear mixed effects model analysis of estimated dry masses of mean total litterfall and its fractions of leaves, small woods, reproductive and trash productions ( $\text{t ha}^{-1} \text{yr}^{-1}$ ) showing the effects of forest, *Acacia* and rainfall (expressed as sliding thirty days totals, STDT) and their interactions. Significant P-values are highlighted in bold.

| Effect                            | Total litterfall |       |               | Leaf litterfall |       |               | Small woods |      |         |
|-----------------------------------|------------------|-------|---------------|-----------------|-------|---------------|-------------|------|---------|
|                                   | df               | F     | P-value       | df              | F     | P-value       | df          | F    | P-value |
| Forest                            | 1                | 1.82  | 0.179         | 1               | 0.73  | 0.392         | 1           | 0.11 | 0.741   |
| <i>Acacia</i>                     | 1                | 11.66 | <b>0.0007</b> | 1               | 13.77 | <b>0.0003</b> | 1           | 0.76 | 0.384   |
| Rainfall                          | 1                | 3.00  | 0.114         | 1               | 5.47  | <b>0.041</b>  | 1           | 0.61 | 0.453   |
| Forest x <i>Acacia</i>            | 1                | 6.58  | <b>0.011</b>  | 1               | 6.94  | <b>0.009</b>  | 1           | 3.02 | 0.084   |
| Forest x Rainfall                 | 1                | 0.06  | 0.808         | 1               | 0.39  | 0.532         | 1           | 2.38 | 0.124   |
| <i>Acacia</i> x Rainfall          | 1                | 1.36  | 0.245         | 1               | 3.18  | 0.076         | 1           | 0.38 | 0.541   |
| Forest x <i>Acacia</i> x Rainfall | 1                | 0.12  | 0.731         | 1               | 1.79  | 0.183         | 1           | 0.10 | 0.757   |

  

| Effect                            | Reproductive |       |                   | Trash |       |               |
|-----------------------------------|--------------|-------|-------------------|-------|-------|---------------|
|                                   | df           | F     | P-value           | df    | F     | P-value       |
| Forest                            | 1            | 21.86 | <b>&lt;0.0001</b> | 1     | 2.63  | 0.106         |
| <i>Acacia</i>                     | 1            | 64.13 | <b>&lt;0.0001</b> | 1     | 0.76  | 0.383         |
| Rainfall                          | 1            | 9.81  | <b>0.011</b>      | 1     | 0.18  | 0.680         |
| Forest x <i>Acacia</i>            | 1            | 3.55  | 0.061             | 1     | 1.72  | 0.191         |
| Forest x Rainfall                 | 1            | 0.23  | 0.635             | 1     | 0.69  | 0.408         |
| <i>Acacia</i> x Rainfall          | 1            | 1.20  | 0.274             | 1     | 11.86 | <b>0.0007</b> |
| Forest x <i>Acacia</i> x Rainfall | 1            | 1.99  | 0.160             | 1     | 0.17  | 0.677         |

(A) Heath Forest

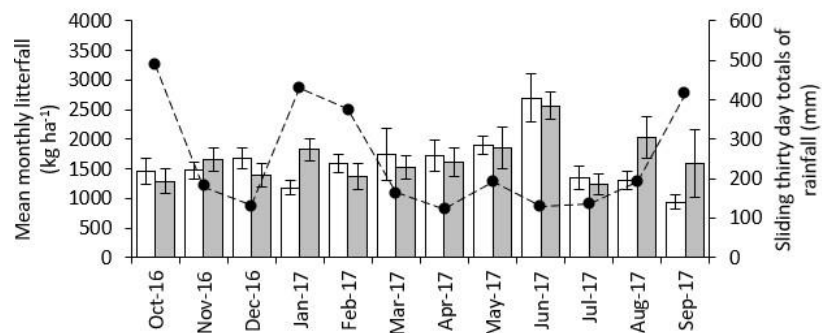

(F) Mixed Dipterocarp Forest

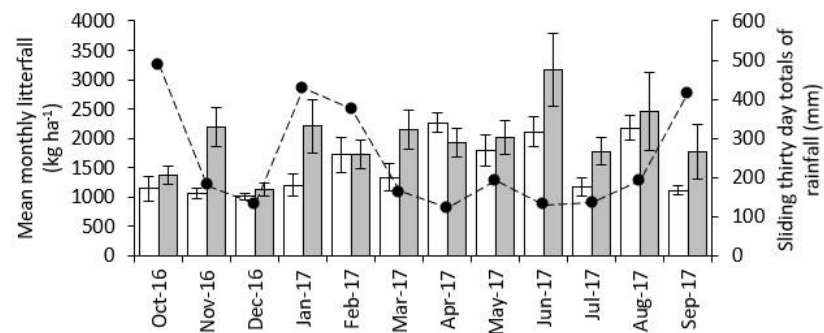

(B)

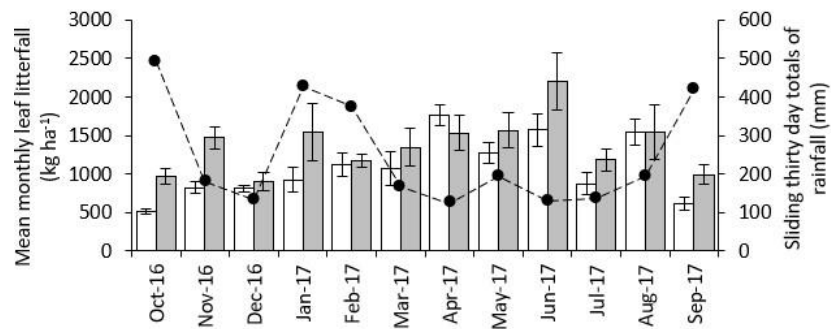

(G)

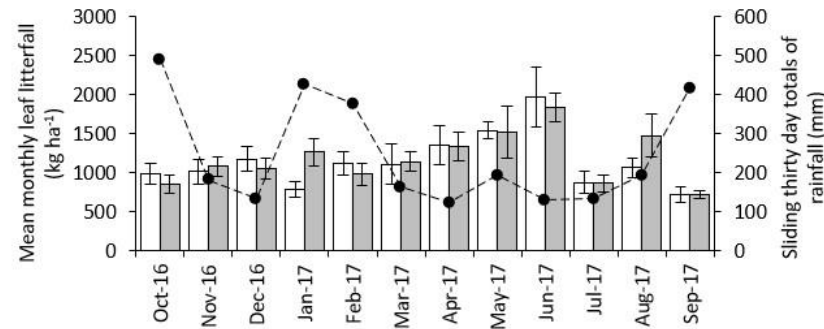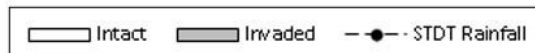

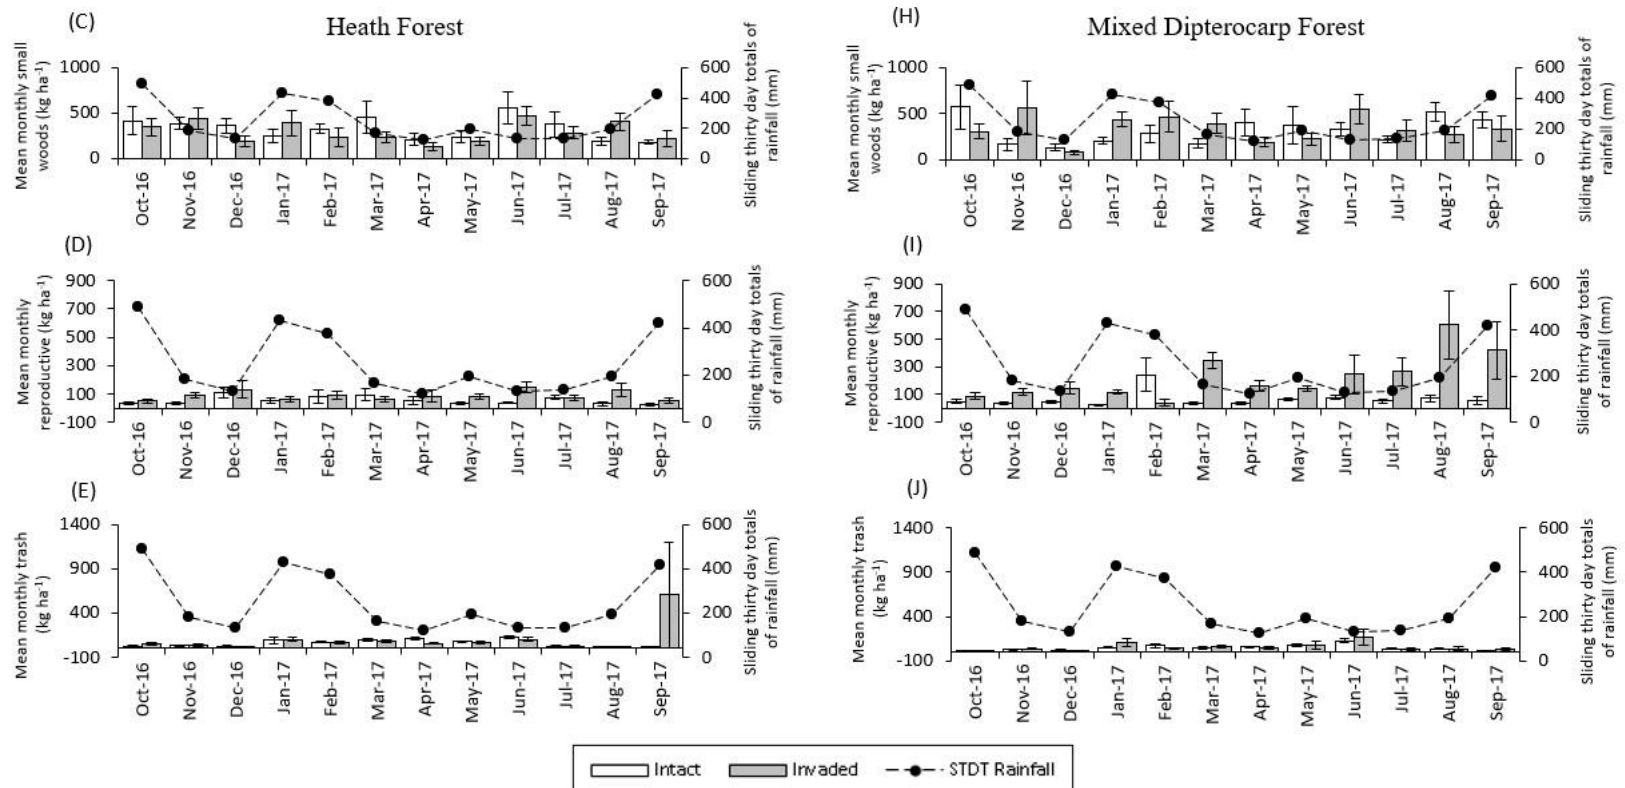

**Figure S1.** Seasonality of mean monthly total litterfall, leaf litterfall, small woods, reproductive and trash productions (kg ha<sup>-1</sup>) and sliding thirty days total rainfall (STDTR; mm) for each litterfall collection month over a 12-month period (October 2016 – September 2017) in intact and *Acacia*-invaded heath forest (A-E) and mixed dipterocarp forest (F-J). Values on bar graphs are mean  $\pm$  standard error, SE. Sliding thirty days total rainfall (STDTR; mm) was calculated by summing the rainfall recorded for a particular sampling day and the preceding 29 days

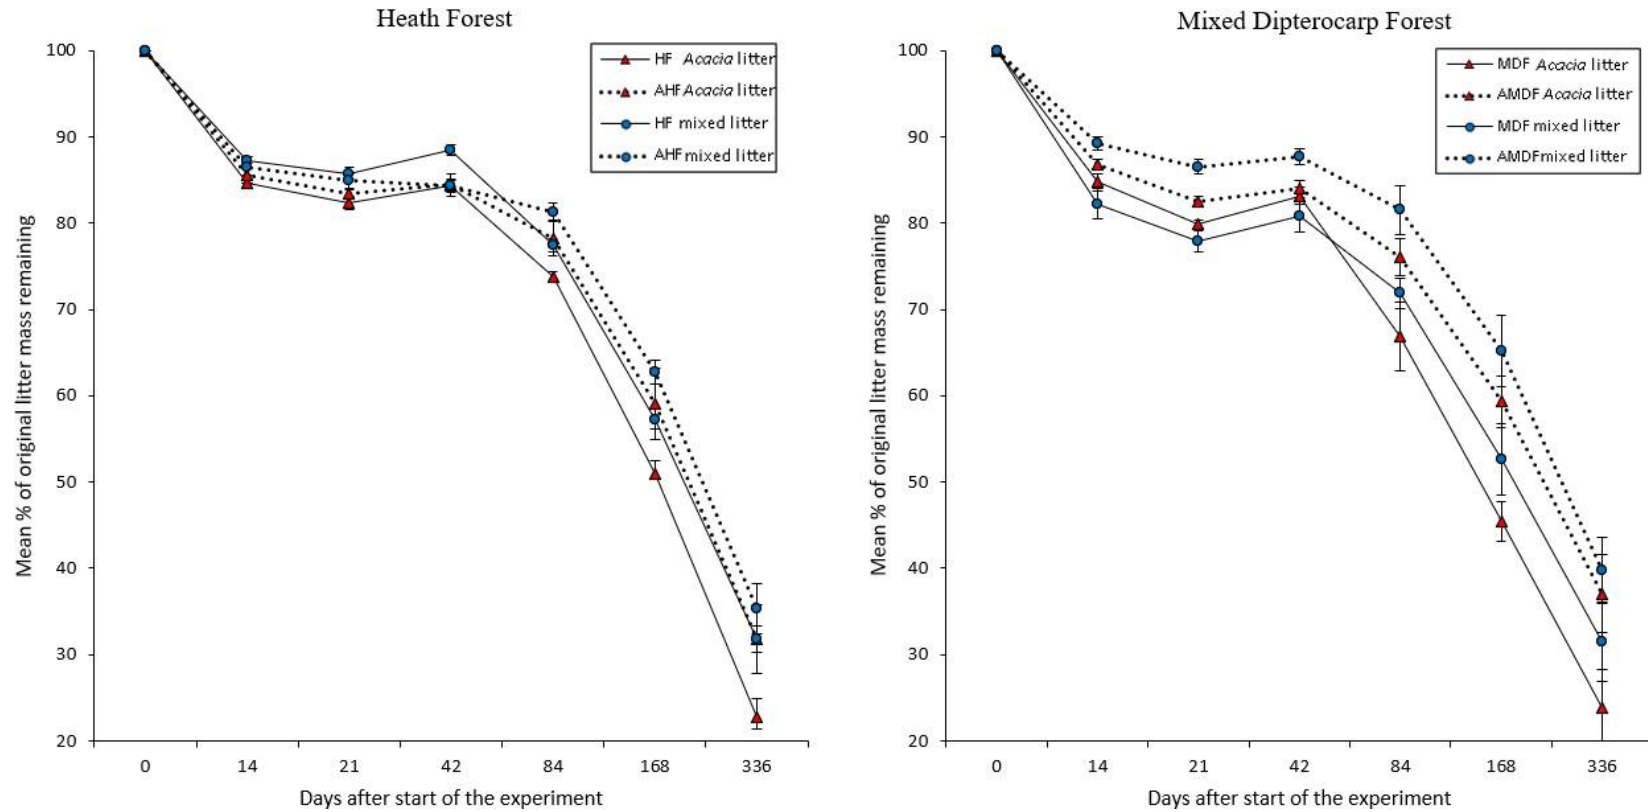

**Figure S2.** Mean percentage of original litter mass remaining in litter decomposition bags over time (day 0 to day 336). Two types of litter (*Acacia* litter and mixed species litter) were deployed in four different habitats: intact heath forest (HF), *Acacia*-invaded heath forest (AHF), intact mixed dipterocarp forest (MDF) and *Acacia*-invaded mixed dipterocarp forest (AMDF). All values are mean  $\pm$  standard error, SE.
